# Supplementary material for: Impact of Maternal Fish Consumption on Serum Docosahexaenoic Acid (DHA) Levels in Breastfed Infants: A Cross-Sectional Study of a Randomized Clinical Trial in Japan
Source: MDPI journal article supplement (doi:10.3390/nu15204338), 2023-10-11
Supplement: s1 [file s1]

## Supplementary Materials

**Table S1.** Fatty acid composition of cow's milk formula (CMF) (Hohoemi®)

| Fatty acid               |         | Weight % |
|--------------------------|---------|----------|
| Butyric acid             | 4:0     | 0.2      |
| Caproic acid             | 6:0     | 0.1      |
| Caprylic acid            | 8:0     | 0.3      |
| Capric acid              | 10:0    | 0.4      |
| Lauric acid              | 12:0    | 4.8      |
| Myristic acid            | 14:0    | 3.5      |
| Palmitic acid            | 16:0    | 20.7     |
| Stearic acid             | 18:0    | 9.2      |
| Palmitoleic acid         | 16:1n-7 | 1.8      |
| Oleic acid               | 18:1n-9 | 37.4     |
| Linoleic acid            | 18:2n-6 | 15.9     |
| $\alpha$ -linolenic acid | 18:3n-3 | 1.6      |
| Arachidic acid           | 20:4n-6 | 0.27     |
| Docosahexaenoic acid     | 22:6n-3 | 0.40     |

Some fatty acids were not identified.

**Table S2.** Fatty acid composition of the elemental formula (EF) (Meiji Elemental formula®)

| Fatty acids              |         | Weight % |
|--------------------------|---------|----------|
| Palmitic acid            | 16:0    | 6.6      |
| Palmitoleic acid         | 16:1n-7 | 0.1      |
| Stearic acid             | 18:0    | 2.5      |
| Oleic acid               | 18:1n-9 | 15.9     |
| Linoleic acid            | 18:2n-6 | 60.2     |
| $\alpha$ -linolenic acid | 18:3n-3 | 12.4     |
| Arachidic acid           | 20:0    | 0.4      |
| Eicosenoic acid          | 20:1n-9 | 0.2      |
| Behenic acid             | 22:0    | 0.2      |
| Nervonic acid            | 24:1n-9 | 0.1      |

Some fatty acids were not identified.

**Table S3.** Nutritional composition of cow's milk formula (CMF) (Hohoemi®) and elemental formula (EF) (Meiji Elemental formula®)

|                              |      | CMF (Hohoemi®)<br>Per 100 mL of 13.5% adjusted<br>solution | EF (Meiji Elemental formula®)<br>per 100 mL of 17% adjusted<br>solution |
|------------------------------|------|------------------------------------------------------------|-------------------------------------------------------------------------|
| Energy                       | kcal | 68                                                         | 66                                                                      |
| Protein                      | g    | 1.5                                                        | 2                                                                       |
| Lipids                       | g    | 3.52                                                       | 0.43                                                                    |
| Carbohydrates                | g    | 7.79                                                       | 13                                                                      |
| Sodium<br>chloride<br>amount | g    | 0.049                                                      | 0.079                                                                   |
| Niacin                       | mg   | 0.41                                                       | 1.0                                                                     |
| Pantothenic<br>acid          | mg   | 0.58                                                       | 0.71                                                                    |
| Biotin                       | µg   | 0.35                                                       | 1.6                                                                     |
| Vitamin A                    | µg   | 53                                                         | 53                                                                      |
| Vitamin B <sub>1</sub>       | mg   | 0.054                                                      | 0.10                                                                    |
| Vitamin B <sub>2</sub>       | mg   | 0.081                                                      | 0.15                                                                    |
| Vitamin B <sub>6</sub>       | mg   | 0.041                                                      | 0.051                                                                   |
| Vitamin B <sub>12</sub>      | µg   | 0.27                                                       | 0.68                                                                    |
| Vitamin C                    | mg   | 9.5                                                        | 8.5                                                                     |
| Vitamin D                    | µg   | 0.88                                                       | 0.90                                                                    |
| Vitamin E                    | mg   | 0.84                                                       | 1.0                                                                     |
| Vitamin K                    | µg   | 3.4                                                        | 4.3                                                                     |
| Folic acid                   | µg   | 14                                                         | 34                                                                      |
| Zinc                         | mg   | 0.41                                                       | 0.48                                                                    |
| Potassium                    | mg   | 66                                                         | 77                                                                      |
| Calcium                      | mg   | 51                                                         | 65                                                                      |
| Selenium                     | µg   | 1.4                                                        | 1.8                                                                     |
| Iron                         | mg   | 0.81                                                       | 1.1                                                                     |
| Copper                       | mg   | 43                                                         | 54                                                                      |
| Magnesium                    | mg   | 5.4                                                        | 7.1                                                                     |
| Phosphorus                   | mg   | 28                                                         | 37                                                                      |

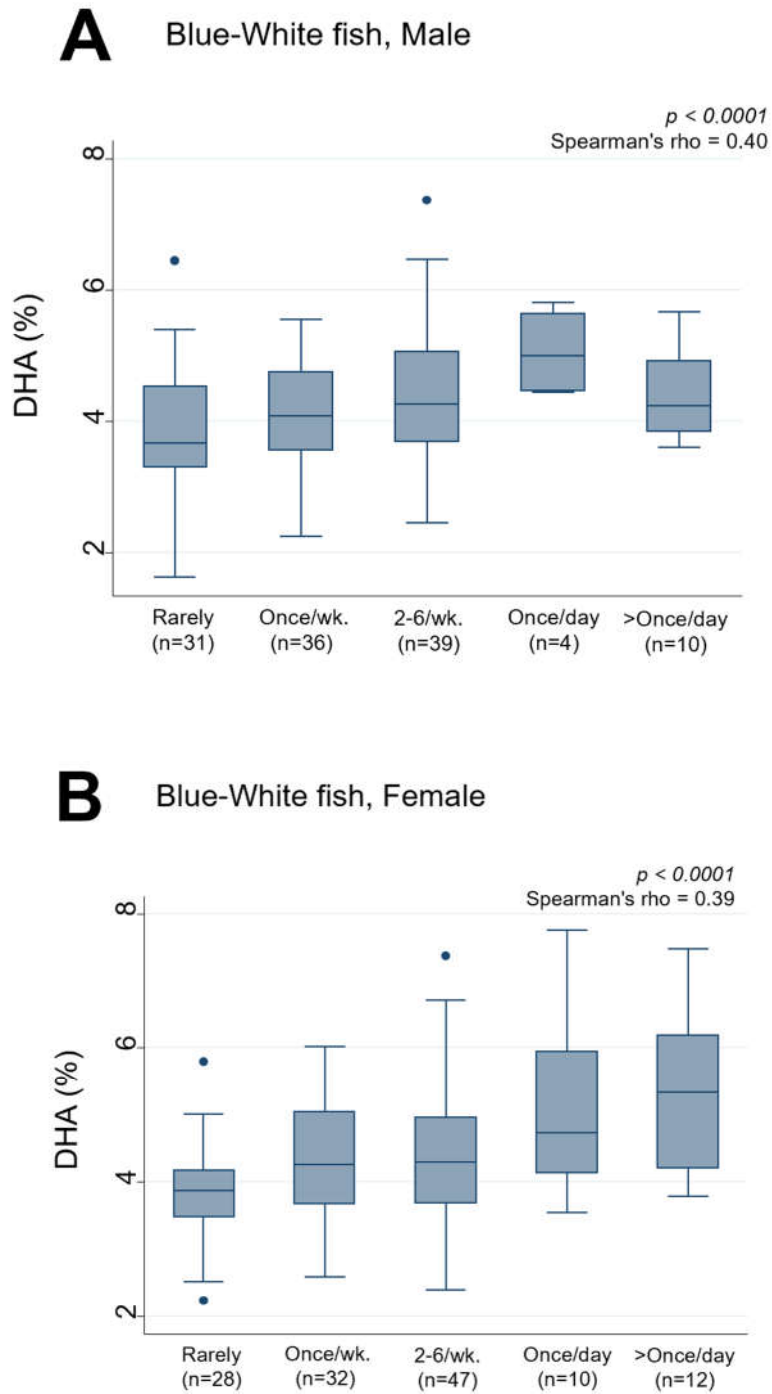

**Figure S1.** Frequency of Blue-White fish consumption by lactating mothers and the levels of serum DHA (%) in their infants. (A) Males, (B) Females.
